# Supplementary material for: Assessment on solubility and solid phase chemical fractionation of manganese in hot infusions of green and roasted mate
Source: Research Square preprint supplement (doi:10.21203/rs.3.rs-2298212/v1), 2022-11-28
Supplement: Supplementary file 1 [file 02630f9f6046005d174df507.docx]

Table S1. Extraction percentages of Mn from the roasted and green mate samples to their hot infusions (mean ± standard deviation, n = 4).

| Infusionse | Mn (%) |
| --- | --- |
| RM 1 | 35.0 ± 0.5a |
| RM 2 | 43.8 ± 0.1b |
| RM 3 | 26.0 ± 1.1c |
| GM 1 | 70.4 ± 1.5d |
| GM 2 | 69.8 ± 0.7d |
| GM 3 | 71.7 ± 4.0d |

e infusions prepared by the mixture of minced and sieved mate samples 1, 2, and 3 with hot ultrapure water (80 °C for 3 min); different superscript letters (a, b, c, and d) presented in the same column indicate significant difference at 95% by the Tukey’s test (p<0.05); RM and GM are the abbreviations used for roasted mate and green mate, respectively.
